# Supplementary material
Source: PubMed Central journal article supplement (PMC4959288)
Supplement: JB.00218-16_zjb999094053so1.pdf [file JB.00218-16_zjb999094053so1.pdf]

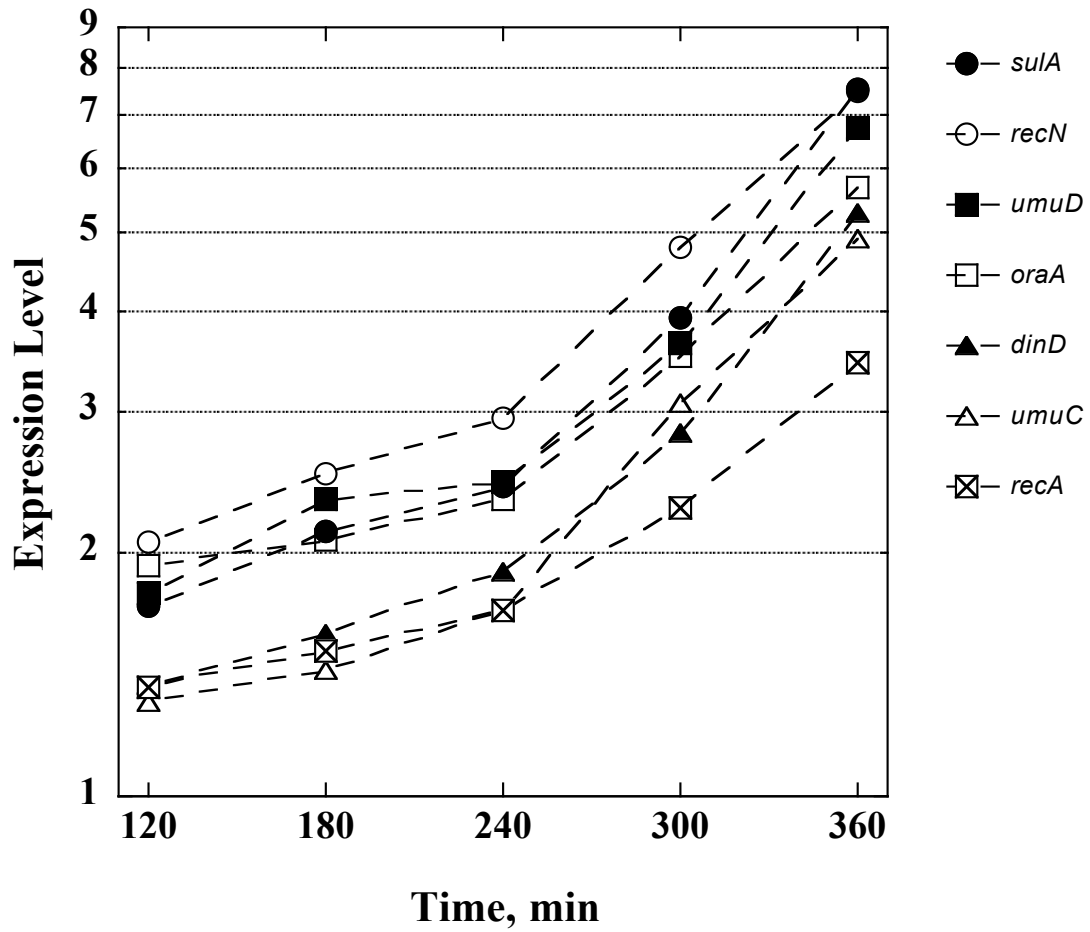

Supplementary FIG. 1. Kinetics of SOS induction in the *optAI gpt* strain upon hypoxanthine withdrawal (high-dilution protocol). The Legend denotes the individual SOS genes that are plotted in this graph.
